# Supplementary material for: LGALS3 is connected to CD74 in a previously unknown protein network that is associated with poor survival in patients with AML
Source: PubMed Central journal article supplement — eBioMedicine. 2019 May 16;44:126–37. doi: 10.1016/j.ebiom.2019.05.025 (PMC6604360; doi:10.1016/j.ebiom.2019.05.025), 2019-05-16
Supplement: mmc1.pdf [file mmc1.pdf]

Supplemental Table 1. Top 100 (of 588 total) biological pathways associated with LGALS3 RPPA network

| #pathway ID | pathway description                                   | observed gene count | false discovery rate |
|-------------|-------------------------------------------------------|---------------------|----------------------|
| GO.0006468  | protein phosphorylation                               | 16                  | 3.41E-10             |
| GO.0007166  | cell surface receptor signaling pathway               | 22                  | 3.41E-10             |
| GO.0032268  | regulation of cellular protein metabolic process      | 22                  | 1.00E-09             |
| GO.0032270  | pos. regulation of cellular protein metabolic process | 18                  | 1.07E-09             |
| GO.0016310  | phosphorylation                                       | 16                  | 7.93E-09             |
| GO.0030335  | positive regulation of cell migration                 | 11                  | 1.36E-08             |
| GO.0006952  | defense response                                      | 17                  | 1.86E-08             |
| GO.0031325  | positive regulation of cellular metabolic process     | 22                  | 1.86E-08             |
| GO.0071363  | cellular response to growth factor stimulus           | 13                  | 1.86E-08             |
| GO.0070887  | cellular response to chemical stimulus                | 20                  | 3.24E-08             |
| GO.0010604  | pos. regulation of macromolecule metabolic process    | 21                  | 4.17E-08             |
| GO.0006796  | phosphate-containing compound metabolic process       | 18                  | 5.31E-08             |
| GO.0002682  | regulation of immune system process                   | 16                  | 7.88E-08             |
| GO.0007167  | enzyme linked receptor protein signaling pathway      | 14                  | 7.88E-08             |
| GO.0048522  | positive regulation of cellular process               | 25                  | 9.97E-08             |
| GO.0048584  | positive regulation of response to stimulus           | 18                  | 1.07E-07             |
| GO.0050776  | regulation of immune response                         | 13                  | 1.70E-07             |
| GO.0051272  | pos. regulation of cellular component movement        | 10                  | 1.79E-07             |
| GO.0002376  | immune system process                                 | 18                  | 1.82E-07             |
| GO.1902533  | pos. regulation of intracellular signal transduction  | 13                  | 1.92E-07             |
| GO.0006464  | cellular protein modification process                 | 20                  | 2.32E-07             |
| GO.0034110  | regulation of homotypic cell-cell adhesion            | 9                   | 2.32E-07             |
| GO.0008283  | cell proliferation                                    | 12                  | 2.71E-07             |
| GO.2001233  | regulation of apoptotic signaling pathway             | 10                  | 2.92E-07             |
| GO.1901699  | cellular response to nitrogen compound                | 11                  | 3.46E-07             |
| GO.0010647  | positive regulation of cell communication             | 16                  | 4.08E-07             |
| GO.0033043  | regulation of organelle organization                  | 14                  | 4.08E-07             |
| GO.0080135  | regulation of cellular response to stress             | 12                  | 4.63E-07             |
| GO.0050865  | regulation of cell activation                         | 10                  | 5.63E-07             |
| GO.0060255  | regulation of macromolecule metabolic process         | 26                  | 5.65E-07             |
| GO.0030155  | regulation of cell adhesion                           | 11                  | 5.74E-07             |
| GO.0045087  | innate immune response                                | 13                  | 5.81E-07             |
| GO.1902531  | regulation of intracellular signal transduction       | 15                  | 5.88E-07             |
| GO.0035295  | tube development                                      | 11                  | 6.13E-07             |
| GO.0080090  | regulation of primary metabolic process               | 26                  | 6.13E-07             |
| GO.0001932  | regulation of protein phosphorylation                 | 14                  | 7.44E-07             |
| GO.0014070  | response to organic cyclic compound                   | 12                  | 1.09E-06             |
| GO.0048015  | phosphatidylinositol-mediated signaling               | 7                   | 1.14E-06             |
| GO.0010821  | regulation of mitochondrion organization              | 9                   | 1.17E-06             |
| GO.0002764  | immune response-regulating signaling pathway          | 10                  | 1.23E-06             |
| GO.0038093  | Fc receptor signaling pathway                         | 8                   | 1.23E-06             |
| GO.0051239  | regulation of multicellular organismal process        | 18                  | 1.26E-06             |
| GO.0006950  | response to stress                                    | 21                  | 1.44E-06             |
| GO.0042325  | regulation of phosphorylation                         | 14                  | 1.45E-06             |
| GO.0071417  | cellular response to organonitrogen compound          | 10                  | 1.45E-06             |
| GO.0031401  | positive regulation of protein modification process   | 13                  | 1.48E-06             |
| GO.0051174  | regulation of phosphorus metabolic process            | 15                  | 1.48E-06             |
| GO.0009888  | tissue development                                    | 15                  | 1.88E-06             |
| GO.0009725  | response to hormone                                   | 12                  | 2.06E-06             |

|            |                                                             |    |          |
|------------|-------------------------------------------------------------|----|----------|
| GO.0006955 | immune response                                             | 14 | 2.08E-06 |
| GO.0045859 | regulation of protein kinase activity                       | 11 | 2.19E-06 |
| GO.0071310 | cellular response to organic substance                      | 16 | 2.19E-06 |
| GO.0031399 | regulation of protein modification process                  | 15 | 2.34E-06 |
| GO.0002768 | immune response-reg. cell surface receptor sig. pathway     | 9  | 2.43E-06 |
| GO.0051338 | regulation of transferase activity                          | 12 | 2.43E-06 |
| GO.0007169 | transmembrane receptor protein tyr. kinase sig. pathway     | 11 | 2.46E-06 |
| GO.0002694 | regulation of leukocyte activation                          | 9  | 2.92E-06 |
| GO.0038095 | Fc-epsilon receptor signaling pathway                       | 7  | 3.37E-06 |
| GO.0043065 | positive regulation of apoptotic process                    | 10 | 3.70E-06 |
| GO.0051130 | positive regulation of cellular component organization      | 13 | 3.72E-06 |
| GO.0043549 | regulation of kinase activity                               | 11 | 3.77E-06 |
| GO.0048545 | response to steroid hormone                                 | 9  | 3.77E-06 |
| GO.0008631 | intrinsic apoptotic sig. path. response to oxidative stress | 4  | 3.84E-06 |
| GO.0002521 | leukocyte differentiation                                   | 8  | 4.29E-06 |
| GO.0048608 | reproductive structure development                          | 9  | 4.29E-06 |
| GO.0051726 | regulation of cell cycle                                    | 12 | 4.29E-06 |
| GO.0061458 | reproductive system development                             | 9  | 4.53E-06 |
| GO.0042493 | response to drug                                            | 9  | 4.57E-06 |
| GO.0036473 | cell death in response to oxidative stress                  | 4  | 4.58E-06 |
| GO.0045937 | positive regulation of phosphate metabolic process          | 12 | 4.63E-06 |
| GO.0048513 | organ development                                           | 18 | 5.66E-06 |
| GO.0042127 | regulation of cell proliferation                            | 14 | 6.03E-06 |
| GO.0030334 | regulation of cell migration                                | 10 | 6.47E-06 |
| GO.0043408 | regulation of MAPK cascade                                  | 10 | 6.47E-06 |
| GO.0030099 | myeloid cell differentiation                                | 7  | 6.90E-06 |
| GO.0001934 | positive regulation of protein phosphorylation              | 11 | 7.37E-06 |
| GO.2001234 | negative regulation of apoptotic signaling pathway          | 7  | 7.51E-06 |
| GO.0071495 | cellular response to endogenous stimulus                    | 12 | 7.57E-06 |
| GO.0010638 | positive regulation of organelle organization               | 10 | 8.07E-06 |
| GO.0097305 | response to alcohol                                         | 8  | 8.07E-06 |
| GO.0002684 | positive regulation of immune system process                | 11 | 8.58E-06 |
| GO.0035556 | intracellular signal transduction                           | 15 | 1.02E-05 |
| GO.0042327 | positive regulation of phosphorylation                      | 11 | 1.02E-05 |
| GO.0009967 | positive regulation of signal transduction                  | 13 | 1.08E-05 |
| GO.0019538 | protein metabolic process                                   | 21 | 1.08E-05 |
| GO.0032355 | response to estradiol                                       | 6  | 1.08E-05 |
| GO.0051249 | regulation of lymphocyte activation                         | 8  | 1.08E-05 |
| GO.0043069 | negative regulation of programmed cell death                | 11 | 1.12E-05 |
| GO.0042592 | homeostatic process                                         | 13 | 1.16E-05 |
| GO.0010646 | regulation of cell communication                            | 18 | 1.24E-05 |
| GO.0018193 | peptidyl-amino acid modification                            | 11 | 1.28E-05 |
| GO.1901698 | response to nitrogen compound                               | 11 | 1.30E-05 |
| GO.0050790 | regulation of catalytic activity                            | 16 | 1.45E-05 |
| GO.0051094 | positive regulation of developmental process                | 12 | 1.57E-05 |
| GO.0042221 | response to chemical                                        | 20 | 2.07E-05 |
| GO.0032103 | positive regulation of response to external stimulus        | 8  | 2.13E-05 |
| GO.0002696 | positive regulation of leukocyte activation                 | 7  | 2.14E-05 |
| GO.0031323 | regulation of cellular metabolic process                    | 24 | 2.18E-05 |
| GO.0050863 | regulation of T cell activation                             | 7  | 2.18E-05 |
| GO.0051384 | response to glucocorticoid                                  | 6  | 2.18E-05 |

Supplemental Table 2. Top KEGG pathways (86 total) associated with LGALS3 RPPA network

| #pathway ID | pathway description                       | observed gene count | false discovery rate |
|-------------|-------------------------------------------|---------------------|----------------------|
| 4151        | PI3K-Akt signaling pathway                | 13                  | 1.80E-12             |
| 5200        | Pathways in cancer                        | 13                  | 1.80E-12             |
| 4510        | Focal adhesion                            | 10                  | 1.54E-10             |
| 4666        | Fc gamma R-mediated phagocytosis          | 8                   | 1.54E-10             |
| 5215        | Prostate cancer                           | 8                   | 1.54E-10             |
| 5221        | Acute myeloid leukemia                    | 7                   | 3.16E-10             |
| 4066        | HIF-1 signaling pathway                   | 8                   | 4.39E-10             |
| 4015        | Rap1 signaling pathway                    | 9                   | 2.86E-09             |
| 5206        | MicroRNAs in cancer                       | 8                   | 4.86E-09             |
| 5213        | Endometrial cancer                        | 6                   | 9.84E-09             |
| 5210        | Colorectal cancer                         | 6                   | 2.03E-08             |
| 4014        | Ras signaling pathway                     | 8                   | 9.91E-08             |
| 5205        | Proteoglycans in cancer                   | 8                   | 9.91E-08             |
| 4012        | ErbB signaling pathway                    | 6                   | 1.60E-07             |
| 4370        | VEGF signaling pathway                    | 5                   | 1.30E-06             |
| 4664        | Fc epsilon RI signaling pathway           | 5                   | 2.16E-06             |
| 5218        | Melanoma                                  | 5                   | 2.41E-06             |
| 5220        | Chronic myeloid leukemia                  | 5                   | 2.41E-06             |
| 5161        | Hepatitis B                               | 6                   | 2.61E-06             |
| 5222        | Small cell lung cancer                    | 5                   | 5.84E-06             |
| 5202        | Transcriptional misregulation in cancer   | 6                   | 6.26E-06             |
| 5169        | Epstein-Barr virus infection              | 6                   | 1.37E-05             |
| 4722        | Neurotrophin signaling pathway            | 5                   | 2.32E-05             |
| 4919        | Thyroid hormone signaling pathway         | 5                   | 2.32E-05             |
| 5223        | Non-small cell lung cancer                | 4                   | 3.08E-05             |
| 4910        | Insulin signaling pathway                 | 5                   | 4.23E-05             |
| 5212        | Pancreatic cancer                         | 4                   | 4.50E-05             |
| 5214        | Glioma                                    | 4                   | 4.50E-05             |
| 5166        | HTLV-I infection                          | 6                   | 5.25E-05             |
| 4662        | B cell receptor signaling pathway         | 4                   | 6.88E-05             |
| 4210        | Apoptosis                                 | 4                   | 0.000141             |
| 5216        | Thyroid cancer                            | 3                   | 0.000141             |
| 5203        | Viral carcinogenesis                      | 5                   | 0.000155             |
| 4064        | NF-kappa B signaling pathway              | 4                   | 0.00016              |
| 4915        | Estrogen signaling pathway                | 4                   | 0.000193             |
| 5219        | Bladder cancer                            | 3                   | 0.000323             |
| 4670        | Leukocyte transendothelial migration      | 4                   | 0.000393             |
| 4068        | FoxO signaling pathway                    | 4                   | 0.000484             |
| 4380        | Osteoclast differentiation                | 4                   | 0.000506             |
| 4650        | Natural killer cell mediated cytotoxicity | 4                   | 0.000506             |
| 5160        | Hepatitis C                               | 4                   | 0.000576             |
| 5162        | Measles                                   | 4                   | 0.00058              |
| 5014        | Amyotrophic lateral sclerosis (ALS)       | 3                   | 0.000672             |
| 4390        | Hippo signaling pathway                   | 4                   | 0.000893             |
| 4730        | Long-term depression                      | 3                   | 0.000997             |
| 4921        | Oxytocin signaling pathway                | 4                   | 0.000997             |
| 4022        | cGMP-PKG signaling pathway                | 4                   | 0.00111              |
| 4115        | p53 signaling pathway                     | 3                   | 0.00138              |
| 5152        | uberculosis                               | 4                   | 0.00144              |
| 4520        | Adherens junction                         | 3                   | 0.00157              |
| 4062        | Chemokine signaling pathway               | 4                   | 0.00165              |
| 4350        | TGF-beta signaling pathway                | 3                   | 0.00201              |
| 4144        | Endocytosis                               | 4                   | 0.00208              |
| 4914        | Progesterone-mediated oocyte maturation   | 3                   | 0.00208              |

|      |                                                            |   |         |
|------|------------------------------------------------------------|---|---------|
| 4810 | Regulation of actin cytoskeleton                           | 4 | 0.0027  |
| 4912 | GnRH signaling pathway                                     | 3 | 0.0027  |
| 4916 | Melanogenesis                                              | 3 | 0.00349 |
| 4320 | Dorso-ventral axis formation                               | 2 | 0.00356 |
| 4114 | Oocyte meiosis                                             | 3 | 0.00437 |
| 4668 | TNF signaling pathway                                      | 3 | 0.00442 |
| 4725 | Cholinergic synapse                                        | 3 | 0.00447 |
| 4010 | MAPK signaling pathway                                     | 4 | 0.00492 |
| 5145 | Toxoplasmosis                                              | 3 | 0.00494 |
| 4152 | AMPK signaling pathway                                     | 3 | 0.00579 |
| 4110 | Cell cycle                                                 | 3 | 0.00598 |
| 4611 | Platelet activation                                        | 3 | 0.00662 |
| 4310 | Wnt signaling pathway                                      | 3 | 0.00794 |
| 4932 | Non-alcoholic fatty liver disease (NAFLD)                  | 3 | 0.00997 |
| 4630 | Jak-STAT signaling pathway                                 | 3 | 0.0112  |
| 4930 | Type II diabetes mellitus                                  | 2 | 0.0123  |
| 5010 | Alzheimer s disease                                        | 3 | 0.013   |
| 5164 | Influenza A                                                | 3 | 0.0133  |
| 4913 | Ovarian steroidogenesis                                    | 2 | 0.0145  |
| 5416 | Viral myocarditis                                          | 2 | 0.0173  |
| 4150 | mTOR signaling pathway                                     | 2 | 0.0195  |
| 562  | Inositol phosphate metabolism                              | 2 | 0.0206  |
| 5211 | Renal cell carcinoma                                       | 2 | 0.0223  |
| 5120 | Epithelial cell signaling in Helicobacter pylori infection | 2 | 0.0227  |
| 4917 | Prolactin signaling pathway                                | 2 | 0.0251  |
| 5100 | Bacterial invasion of epithelial cells                     | 2 | 0.0277  |
| 4070 | Phosphatidylinositol signaling system                      | 2 | 0.0311  |
| 4540 | Gap junction                                               | 2 | 0.0346  |
| 4060 | Cytokine-cytokine receptor interaction                     | 3 | 0.0397  |
| 4750 | Inflammatory mediator regulation of TRP channels           | 2 | 0.0428  |
| 4660 | T cell receptor signaling pathway                          | 2 | 0.0458  |
| 4620 | Toll-like receptor signaling pathway                       | 2 | 0.0479  |

Supplemental Table 3. Top 100 (of 535 total) biological pathways associated with CD74 RPPA network

| #pathway ID | pathway description                                         | observed gene count | false discovery rate |
|-------------|-------------------------------------------------------------|---------------------|----------------------|
| GO.0048011  | neurotrophin TRK receptor signaling pathway                 | 15                  | 3.71E-16             |
| GO.0071363  | cellular response to growth factor stimulus                 | 17                  | 2.12E-14             |
| GO.0050776  | regulation of immune response                               | 18                  | 2.16E-14             |
| GO.0038095  | Fc-epsilon receptor signaling pathway                       | 12                  | 3.81E-14             |
| GO.0070887  | cellular response to chemical stimulus                      | 24                  | 3.81E-14             |
| GO.0044344  | cellular response to fibroblast growth factor stimulus      | 12                  | 8.86E-14             |
| GO.0002764  | immune response-regulating signaling pathway                | 15                  | 1.01E-13             |
| GO.0045087  | innate immune response                                      | 18                  | 1.10E-13             |
| GO.0048015  | phosphatidylinositol-mediated signaling                     | 11                  | 1.34E-13             |
| GO.0002768  | immune response-reg. cell surface receptor sig. pathway     | 14                  | 1.36E-13             |
| GO.0048545  | response to steroid hormone                                 | 14                  | 2.80E-13             |
| GO.0007169  | transmembrane receptor protein tyr. kinase sig. pathway     | 16                  | 5.03E-13             |
| GO.0008543  | fibroblast growth factor receptor signaling pathway         | 11                  | 6.49E-13             |
| GO.0006955  | immune response                                             | 19                  | 9.73E-13             |
| GO.0060548  | negative regulation of cell death                           | 17                  | 9.73E-13             |
| GO.0071310  | cellular response to organic substance                      | 21                  | 1.34E-12             |
| GO.0033993  | response to lipid                                           | 16                  | 2.39E-12             |
| GO.0006952  | defense response                                            | 19                  | 2.74E-12             |
| GO.0007173  | epidermal growth factor receptor signaling pathway          | 11                  | 4.95E-12             |
| GO.0071495  | cellular response to endogenous stimulus                    | 17                  | 4.95E-12             |
| GO.0010604  | positive regulation of macromolecule metabolic process      | 23                  | 4.98E-12             |
| GO.0010941  | regulation of cell death                                    | 19                  | 5.16E-12             |
| GO.0043066  | negative regulation of apoptotic process                    | 16                  | 5.16E-12             |
| GO.0051254  | positive regulation of RNA metabolic process                | 19                  | 5.16E-12             |
| GO.0048585  | negative regulation of response to stimulus                 | 18                  | 1.19E-11             |
| GO.0071407  | cellular response to organic cyclic compound                | 12                  | 3.59E-11             |
| GO.0045893  | positive regulation of transcription, DNA-templated         | 18                  | 3.65E-11             |
| GO.0010628  | positive regulation of gene expression                      | 19                  | 3.74E-11             |
| GO.0014070  | response to organic cyclic compound                         | 15                  | 4.13E-11             |
| GO.0048523  | negative regulation of cellular process                     | 25                  | 8.10E-11             |
| GO.0051246  | regulation of protein metabolic process                     | 21                  | 1.32E-10             |
| GO.0051338  | regulation of transferase activity                          | 15                  | 1.62E-10             |
| GO.0031325  | positive regulation of cellular metabolic process           | 22                  | 1.75E-10             |
| GO.1901700  | response to oxygen-containing compound                      | 17                  | 1.78E-10             |
| GO.0051247  | positive regulation of protein metabolic process            | 17                  | 3.79E-10             |
| GO.0023057  | negative regulation of signaling                            | 16                  | 4.12E-10             |
| GO.0010648  | negative regulation of cell communication                   | 16                  | 4.53E-10             |
| GO.0032268  | regulation of cellular protein metabolic process            | 20                  | 4.53E-10             |
| GO.0002376  | immune system process                                       | 19                  | 5.55E-10             |
| GO.0042327  | positive regulation of phosphorylation                      | 14                  | 1.22E-09             |
| GO.0042325  | regulation of phosphorylation                               | 16                  | 1.29E-09             |
| GO.0009968  | negative regulation of signal transduction                  | 15                  | 1.47E-09             |
| GO.0032270  | positive regulation of cellular protein metabolic process   | 16                  | 1.76E-09             |
| GO.0009725  | response to hormone                                         | 14                  | 1.79E-09             |
| GO.0010033  | response to organic substance                               | 20                  | 1.79E-09             |
| GO.0010557  | positive regulation of macromolecule biosynthetic process   | 17                  | 2.95E-09             |
| GO.0002682  | regulation of immune system process                         | 16                  | 3.05E-09             |
| GO.0042981  | regulation of apoptotic process                             | 16                  | 3.96E-09             |
| GO.0006357  | regulation of transcription from RNA polymerase II promoter | 17                  | 5.00E-09             |
| GO.0006950  | response to stress                                          | 22                  | 6.07E-09             |
| GO.0097305  | response to alcohol                                         | 10                  | 6.27E-09             |
| GO.0051252  | regulation of RNA metabolic process                         | 22                  | 6.55E-09             |
| GO.0031328  | positive regulation of cellular biosynthetic process        | 17                  | 7.39E-09             |
| GO.0001934  | positive regulation of protein phosphorylation              | 13                  | 9.81E-09             |

|            |                                                            |    |          |
|------------|------------------------------------------------------------|----|----------|
| GO.1901701 | cellular response to oxygen-containing compound            | 13 | 9.81E-09 |
| GO.0009966 | regulation of signal transduction                          | 19 | 1.04E-08 |
| GO.0071396 | cellular response to lipid                                 | 10 | 1.97E-08 |
| GO.0048583 | regulation of response to stimulus                         | 21 | 3.01E-08 |
| GO.0006355 | regulation of transcription, DNA-templated                 | 21 | 3.23E-08 |
| GO.0048519 | negative regulation of biological process                  | 23 | 3.27E-08 |
| GO.0009719 | response to endogenous stimulus                            | 15 | 5.14E-08 |
| GO.0080134 | regulation of response to stress                           | 15 | 5.66E-08 |
| GO.0048608 | reproductive structure development                         | 10 | 5.96E-08 |
| GO.0051347 | positive regulation of transferase activity                | 11 | 6.14E-08 |
| GO.0065009 | regulation of molecular function                           | 19 | 6.14E-08 |
| GO.0051726 | regulation of cell cycle                                   | 13 | 6.20E-08 |
| GO.0001932 | regulation of protein phosphorylation                      | 14 | 6.21E-08 |
| GO.0061458 | reproductive system development                            | 10 | 6.21E-08 |
| GO.0010468 | regulation of gene expression                              | 22 | 6.92E-08 |
| GO.0042127 | regulation of cell proliferation                           | 15 | 8.66E-08 |
| GO.0009891 | positive regulation of biosynthetic process                | 16 | 9.10E-08 |
| GO.0043627 | response to estrogen                                       | 8  | 9.80E-08 |
| GO.0003006 | developmental process involved in reproduction             | 11 | 1.05E-07 |
| GO.0006468 | protein phosphorylation                                    | 12 | 1.22E-07 |
| GO.0009894 | regulation of catabolic process                            | 12 | 1.47E-07 |
| GO.0035556 | intracellular signal transduction                          | 16 | 1.52E-07 |
| GO.0031399 | regulation of protein modification process                 | 15 | 2.23E-07 |
| GO.0033554 | cellular response to stress                                | 15 | 3.19E-07 |
| GO.0048522 | positive regulation of cellular process                    | 22 | 3.94E-07 |
| GO.0044093 | positive regulation of molecular function                  | 15 | 5.06E-07 |
| GO.0023051 | regulation of signaling                                    | 18 | 5.46E-07 |
| GO.0032870 | cellular response to hormone stimulus                      | 10 | 6.47E-07 |
| GO.0007166 | cell surface receptor signaling pathway                    | 16 | 7.57E-07 |
| GO.0097192 | extrinsic apoptotic signaling pathway in absence of ligand | 5  | 8.36E-07 |
| GO.0010646 | regulation of cell communication                           | 18 | 1.19E-06 |
| GO.0045944 | pos. reg. of transcription from RNA polymerase II promoter | 12 | 1.28E-06 |
| GO.0042221 | response to chemical                                       | 20 | 1.51E-06 |
| GO.0022402 | cell cycle process                                         | 12 | 1.86E-06 |
| GO.0031401 | positive regulation of protein modification process        | 12 | 1.88E-06 |
| GO.0050790 | regulation of catalytic activity                           | 16 | 1.88E-06 |
| GO.0009967 | positive regulation of signal transduction                 | 13 | 1.98E-06 |
| GO.0044702 | single organism reproductive process                       | 12 | 2.04E-06 |
| GO.0000278 | mitotic cell cycle                                         | 11 | 2.13E-06 |
| GO.0034097 | response to cytokine                                       | 10 | 2.14E-06 |
| GO.0033674 | positive regulation of kinase activity                     | 9  | 2.26E-06 |
| GO.0007049 | cell cycle                                                 | 13 | 2.48E-06 |
| GO.0009896 | positive regulation of catabolic process                   | 9  | 2.81E-06 |
| GO.0048513 | organ development                                          | 17 | 3.22E-06 |
| GO.0045785 | positive regulation of cell adhesion                       | 8  | 3.41E-06 |
| GO.0009628 | response to abiotic stimulus                               | 12 | 3.54E-06 |

Supplemental Table 4. Top KEGG pathways (83 total) associated with CD74 RPPA network

| #pathway ID | pathway description                                        | observed gene count | false discovery rate |
|-------------|------------------------------------------------------------|---------------------|----------------------|
| 5200        | Pathways in cancer                                         | 14                  | 7.11E-15             |
| 5213        | Endometrial cancer                                         | 9                   | 7.27E-15             |
| 5215        | Prostate cancer                                            | 10                  | 7.27E-15             |
| 5206        | MicroRNAs in cancer                                        | 11                  | 1.60E-14             |
| 4151        | PI3K-Akt signaling pathway                                 | 12                  | 4.74E-12             |
| 5223        | Non-small cell lung cancer                                 | 7                   | 1.16E-10             |
| 5161        | Hepatitis B                                                | 8                   | 1.83E-09             |
| 4012        | ErbB signaling pathway                                     | 7                   | 1.97E-09             |
| 4919        | Thyroid hormone signaling pathway                          | 7                   | 1.63E-08             |
| 5212        | Pancreatic cancer                                          | 6                   | 1.63E-08             |
| 4115        | p53 signaling pathway                                      | 6                   | 2.21E-08             |
| 4510        | Focal adhesion                                             | 8                   | 2.21E-08             |
| 5220        | Chronic myeloid leukemia                                   | 6                   | 2.68E-08             |
| 5205        | Proteoglycans in cancer                                    | 8                   | 3.31E-08             |
| 5203        | Viral carcinogenesis                                       | 7                   | 2.54E-07             |
| 4722        | Neurotrophin signaling pathway                             | 6                   | 4.86E-07             |
| 4110        | Cell cycle                                                 | 6                   | 6.20E-07             |
| 4014        | Ras signaling pathway                                      | 7                   | 7.77E-07             |
| 5160        | Hepatitis C                                                | 6                   | 7.77E-07             |
| 5164        | Influenza A                                                | 6                   | 3.46E-06             |
| 5219        | Bladder cancer                                             | 4                   | 4.88E-06             |
| 5169        | Epstein-Barr virus infection                               | 6                   | 6.74E-06             |
| 4066        | HIF-1 signaling pathway                                    | 5                   | 7.77E-06             |
| 4068        | FoxO signaling pathway                                     | 5                   | 1.59E-05             |
| 5221        | Acute myeloid leukemia                                     | 4                   | 2.07E-05             |
| 5162        | Measles                                                    | 5                   | 2.10E-05             |
| 5210        | Colorectal cancer                                          | 4                   | 2.22E-05             |
| 4370        | VEGF signaling pathway                                     | 4                   | 2.46E-05             |
| 4010        | MAPK signaling pathway                                     | 6                   | 2.62E-05             |
| 5214        | Glioma                                                     | 4                   | 2.62E-05             |
| 4662        | B cell receptor signaling pathway                          | 4                   | 3.92E-05             |
| 4917        | Prolactin signaling pathway                                | 4                   | 3.92E-05             |
| 5218        | Melanoma                                                   | 4                   | 3.92E-05             |
| 4062        | Chemokine signaling pathway                                | 5                   | 7.75E-05             |
| 5222        | Small cell lung cancer                                     | 4                   | 8.10E-05             |
| 4912        | GnRH signaling pathway                                     | 4                   | 9.06E-05             |
| 4114        | Oocyte meiosis                                             | 4                   | 0.000185             |
| 4380        | Osteoclast differentiation                                 | 4                   | 0.000336             |
| 4910        | Insulin signaling pathway                                  | 4                   | 0.000431             |
| 4921        | Oxytocin signaling pathway                                 | 4                   | 0.000727             |
| 5202        | Transcriptional misregulation in cancer                    | 4                   | 0.000951             |
| 5120        | Epithelial cell signaling in Helicobacter pylori infection | 3                   | 0.00104              |
| 5152        | Tuberculosis                                               | 4                   | 0.00104              |
| 4920        | Adipocytokine signaling pathway                            | 3                   | 0.00109              |
| 5168        | Herpes simplex infection                                   | 4                   | 0.00109              |
| 5140        | Leishmaniasis                                              | 3                   | 0.00116              |
| 4520        | Adherens junction                                          | 3                   | 0.00119              |
| 4540        | Gap junction                                               | 3                   | 0.00192              |
| 4210        | Apoptosis                                                  | 3                   | 0.00195              |
| 4916        | Melanogenesis                                              | 3                   | 0.00283              |
| 4660        | T cell receptor signaling pathway                          | 3                   | 0.00295              |
| 4320        | Dorso-ventral axis formation                               | 2                   | 0.0031               |
| 4620        | Toll-like receptor signaling pathway                       | 3                   | 0.0031               |
| 5145        | Toxoplasmosis                                              | 3                   | 0.00411              |

|      |                                           |   |         |
|------|-------------------------------------------|---|---------|
| 4670 | Leukocyte transendothelial migration      | 3 | 0.00414 |
| 5216 | Thyroid cancer                            | 2 | 0.00443 |
| 4650 | Natural killer cell mediated cytotoxicity | 3 | 0.00511 |
| 5020 | Prion diseases                            | 2 | 0.0076  |
| 4932 | Non-alcoholic fatty liver disease (NAFLD) | 3 | 0.00824 |
| 5010 | Alzheimer s disease                       | 3 | 0.0111  |
| 4020 | Calcium signaling pathway                 | 3 | 0.0129  |
| 5014 | Amyotrophic lateral sclerosis (ALS)       | 2 | 0.0136  |
| 5016 | Huntington s disease                      | 3 | 0.0139  |
| 5134 | Legionellosis                             | 2 | 0.0148  |
| 5131 | Shigellosis                               | 2 | 0.0168  |
| 4730 | Long-term depression                      | 2 | 0.0171  |
| 4015 | Rap1 signaling pathway                    | 3 | 0.0183  |
| 5321 | Inflammatory bowel disease (IBD)          | 2 | 0.019   |
| 4720 | Long-term potentiation                    | 2 | 0.0193  |
| 5211 | Renal cell carcinoma                      | 2 | 0.0196  |
| 5031 | Amphetamine addiction                     | 2 | 0.0199  |
| 4664 | Fc epsilon RI signaling pathway           | 2 | 0.0202  |
| 3320 | PPAR signaling pathway                    | 2 | 0.0211  |
| 4914 | Progesterone-mediated oocyte maturation   | 2 | 0.0279  |
| 5166 | HTLV-I infection                          | 3 | 0.0287  |
| 4512 | ECM-receptor interaction                  | 2 | 0.0313  |
| 4666 | Fc gamma R-mediated phagocytosis          | 2 | 0.0323  |
| 4064 | NF-kappa B signaling pathway              | 2 | 0.0326  |
| 4915 | Estrogen signaling pathway                | 2 | 0.0358  |
| 5146 | Amoebiasis                                | 2 | 0.0438  |
| 4668 | TNF signaling pathway                     | 2 | 0.0448  |
| 4725 | Cholinergic synapse                       | 2 | 0.0451  |
| 4726 | Serotonergic synapse                      | 2 | 0.0461  |
